# Supplementary material for: Automated time–height-resolved air mass source attribution for profiling remote sensing applications
Source: Copernicus journal article supplement (doi:10.5194/acp-21-3015-2021), 2021-03-01
Supplement: Supplementary file 1 [file acp-21-3015-2021-supplement.zip]

Archive with 3 entries (3 files):
- acp-21-3015-2021-supplement-title-page.pdf
- 20170914_00_3000_r06_limassol_backward.gif
- 20170914_00_3000_r06_limassol_forward.gif
