# Supplementary material for: Automated time–height-resolved air mass source attribution for profiling remote sensing applications
Source: Copernicus journal article supplement (doi:10.5194/acp-21-3015-2021), 2021-03-01
Supplement: Supplementary file 1 [file acp-21-3015-2021-supplement.zip › acp-21-3015-2021-supplement-title-page.pdf]

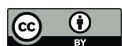

*Supplement of*

## **Automated time–height-resolved air mass source attribution for profiling remote sensing applications**

**Martin Radenz et al.**

*Correspondence to:* Martin Radenz (radenz@tropos.de)

- [acp-21-3015-2021-supplement-title-page.pdf](#)
- [20170914\\_00\\_3000\\_r06\\_limassol\\_backward.gif](#)
- [20170914\\_00\\_3000\\_r06\\_limassol\\_forward.gif](#)

The copyright of individual parts of the supplement might differ from the CC BY 4.0 License.
