# Supplementary figures and images for: Automated time–height-resolved air mass source attribution for profiling remote sensing applications
Source: Copernicus journal article supplement (doi:10.5194/acp-21-3015-2021), 2021-03-01

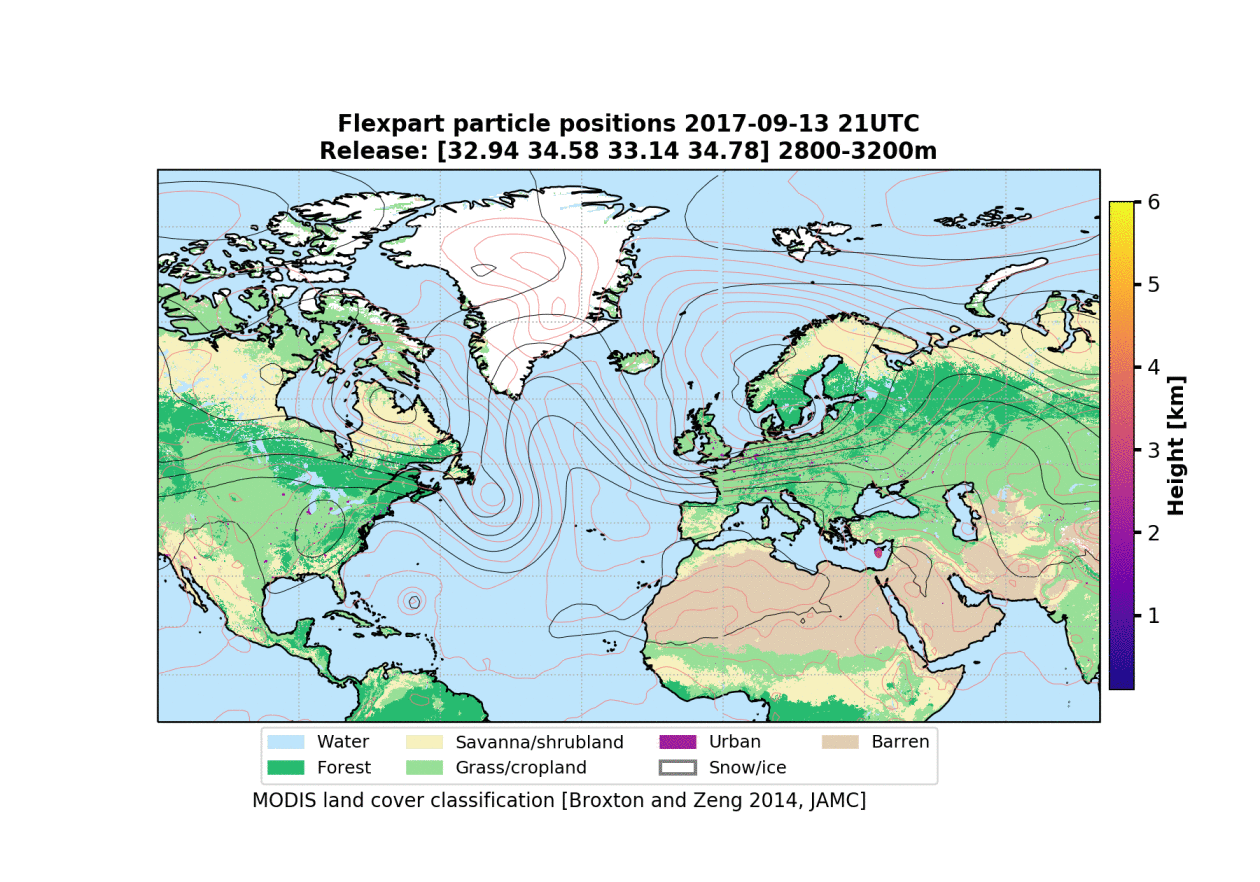

Supplement: Supplementary file 1 [file acp-21-3015-2021-supplement.zip › 20170914_00_3000_r06_limassol_backward.gif]

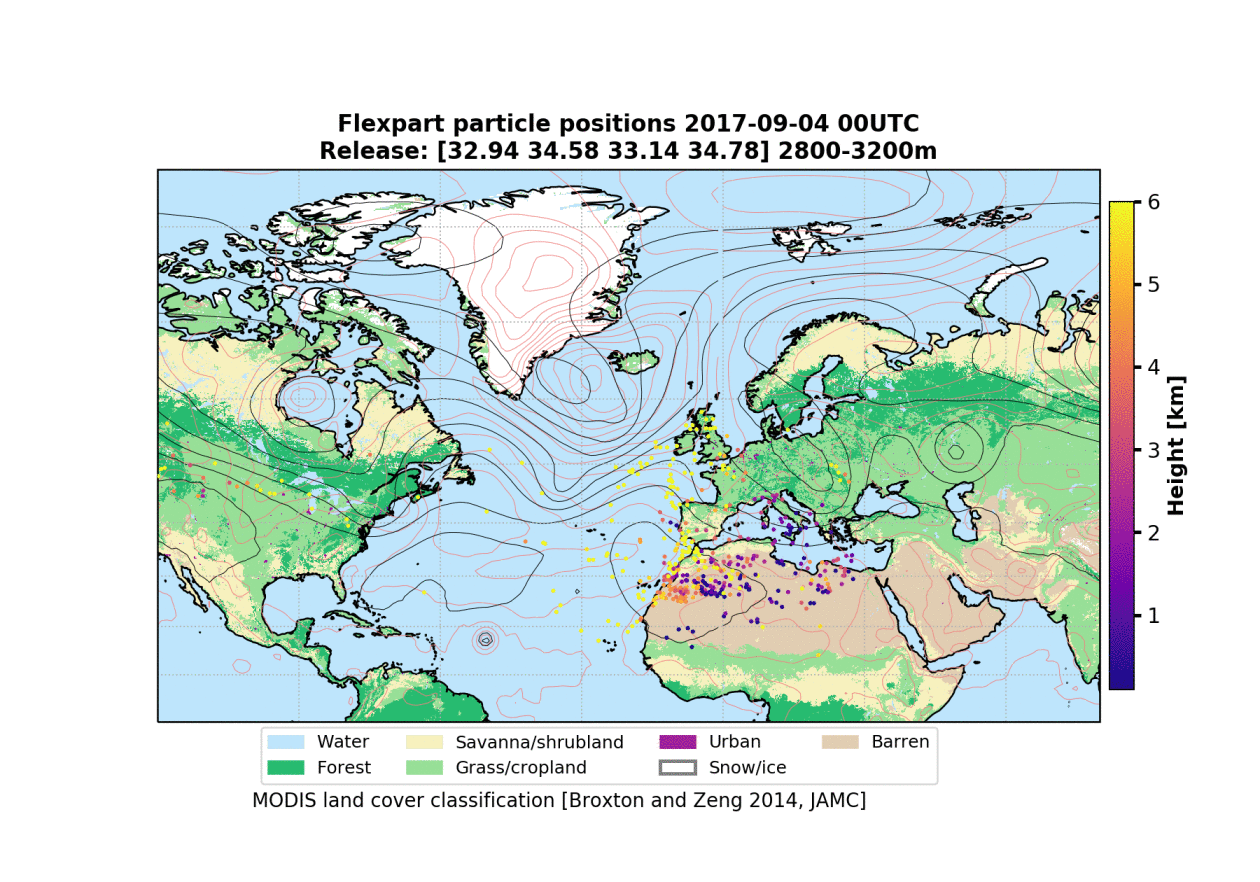

Supplement: Supplementary file 1 [file acp-21-3015-2021-supplement.zip › 20170914_00_3000_r06_limassol_forward.gif]
